# Supplementary material for: Topical sirolimus solution for lingual microcystic lymphatic malformations in children and adults (TOPGUN): study protocol for a multicenter, randomized, assessor-blinded, controlled, stepped-wedge clinical trial
Source: PubMed Central journal article supplement (PMC9270761; doi:10.1186/s13063-022-06365-y), 2022-07-08
Supplement: 13063_2022_6365_MOESM3_ESM.pdf [file 13063_2022_6365_MOESM3_ESM.pdf]

# Department of Medical Affairs and Research

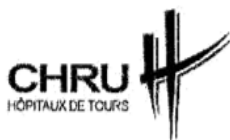

**Direction de la Recherche**  
Directeur  
Violaine MIZZI  
Directeur adjoint  
Julien LE BONNIEC  
Tél : 02.47.47.39.99

**Partenariats et valorisation**  
Delphine VALIN  
[d.valin@chu-tours.fr](mailto:d.valin@chu-tours.fr)  
Tél. 02.34.37.89.23

**Délégation à la Recherche  
Clinique et à l'Innovation**  
Président  
Pr Philippe GOUPILLE  
[philippe.goupille@univ-tours.fr](mailto:philippe.goupille@univ-tours.fr)  
Directeur délégué  
Violaine MIZZI  
[v.mizzi@chu-tours.fr](mailto:v.mizzi@chu-tours.fr)  
Directeur adjoint  
Julien LE BONNIEC  
[j.lebonniec@chu-tours.fr](mailto:j.lebonniec@chu-tours.fr)  
Tél : 02.47.47.39.99

**Gestion et pilotage**  
Attachée d'Administration  
Hospitalière  
Tél. 02.34.37.95.33

**Ingénieur qualité**  
Coraline GADRAS  
[c.gadras@chu-tours.fr](mailto:c.gadras@chu-tours.fr)  
Tél : 02.47.47.59.96

**Cellule d'aide au montage  
des projets**  
Guillaume FLURY  
[g.flury@chu-tours.fr](mailto:g.flury@chu-tours.fr)  
Tél. 02.18.37.08.57

**Promotions CHU et contrôle  
qualité**  
Karine FEVRE  
[k.fevre@chu-tours.fr](mailto:k.fevre@chu-tours.fr)  
Tél. 02.18.37.08.34  
Dr Sophie GUYETANT  
[sophie.guyetant@chu-tours.fr](mailto:sophie.guyetant@chu-tours.fr)  
Tél. 02.34.37.89.27

Christelle MEUNIER  
[c.meunier@chu-tours.fr](mailto:c.meunier@chu-tours.fr)  
Tél. 02.18.37.06.19  
Nathalie JUTEAU  
[n.juteau@chu-tours.fr](mailto:n.juteau@chu-tours.fr)  
Tél. 02.47.47.46.73

**Secrétariat**  
Laëtitia EVEN  
[l.even@chu-tours.fr](mailto:l.even@chu-tours.fr)  
Tél. 02.18.37.06.51

**Promotions externes**  
[promotions.extemes@chu-tours.fr](mailto:promotions.extemes@chu-tours.fr)  
Marie GRANGER  
Tél. 02.18.37.06.18  
Gestionnaire  
Sarah REROLLE  
Tél. 02.47.47.37.99  
Annie FRANCO  
Tél. 02.47.47.70.07

**Secrétariat**  
Nathalie GINESTE  
[n.gineste@chu-tours.fr](mailto:n.gineste@chu-tours.fr)  
Tél : 02.18.37.08.01  
Annie FRANCO  
[a.franco@chu-tours.fr](mailto:a.franco@chu-tours.fr)  
Tél : 02.47.47.70.07

Doctor Antoine Marchand  
Dermatology unity  
CHRU Tours-Trousseau

Tours, 2018 /07/23

Reference : JLB/GF/2018-DR293  
Responsable : Guillaume FLURY  
Copy to : Nathalie JUTEAU

Subject : Promotion AOI 2018

Sir,

We congratulate you on obtaining funding for your "TOPical sirolimus in linGual lymphatic malformationN-TOPGUN "project at AOI 2018.

In order to continue your efforts, the CHRU de Tours naturally promotes your study. The quality control of the protocols promoted by the CHRU de Tours is entrusted to the Clinical Research Associates of the CHRU, who on this point intervene on behalf of the promoter. Also prior to any implementation, I invite you to contact Madame JUTEAU (Tel: 02.47.47.46.73), Project Manager, to agree on the terms of support for monitoring your study.

In addition, I call you that the registration of a clinical trial on the register "Clinicaltrials" has become mandatory. It is up to you to record the study before the first inclusion by filling in the various items for this research.

Please, Sir, with the assurance of my highest consideration.

Le Directeur adjoint,  
Direction des Affaires Médicales  
et de la Recherche,  
Secteur Recherche

Julien LE BONNIEC
